# Supplementary material
Source: PubMed Central journal article supplement (PMC7127965)
Supplement: NIHMS1569091-supplement-1.pdf [file NIHMS1569091-supplement-1.pdf]

## ONLINE APPENDICES

**Figure A1.** Flow diagram of resident inclusion and exclusion in study cohort.

**Table A1.** List of individual statin medications considered in the study and details about medication exposure definition.

**Table A2.** Variables included in the propensity score estimation model.

**Table A3.** Covariate balance between treatment groups before and after propensity score matching.

**Figure A2.** Distribution of the propensity score between statin users and nonusers before and after propensity score matching.

**Table A4.** Effect of statin use versus non-use on outcomes among frail older adults after myocardial infarction before propensity score matching.

**Table A5.** Stability analysis using Fine and Gray subdistribution hazard model to estimate the effect of statin use versus non-use on outcomes among frail older adults after myocardial infarction while accounting for the competing risk of death.

**Table A6.** Subgroup analyses of the effect of statin use versus non-use on rehospitalization among frail older adults after myocardial infarction.

**Figure A1.** Flow diagram of resident inclusion and exclusion in study cohort.

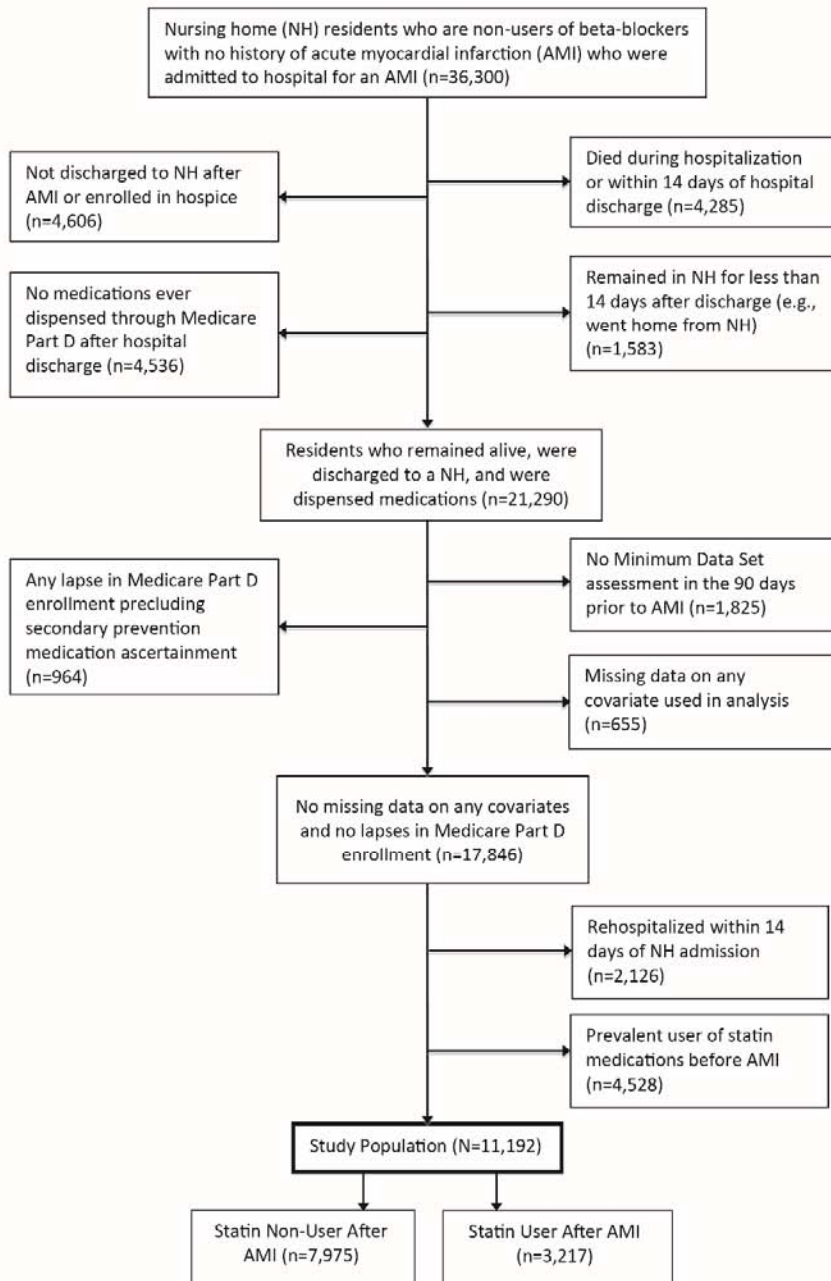

**Table A1.** List of Individual Statin Medications Considered in the Study and Details about Medication Exposure Definition.

*Details of the complementary approaches used to ascertain medication exposure, including a validation cohort using complete prescription drug dispensing data from a large, national private NH chain (HCR ManorCare, Inc., Toledo, OH), are described elsewhere.<sup>1-3</sup> In brief, those approaches are important because Medicare Part D drug dispensing claims are not generated while NH residents receive care through the Skilled Nursing Facility (SNF) benefit.<sup>1-3</sup>*

---

**Individual Statin Drugs Considered**

---

Atorvastatin

Fluvastatin

Lovastatin

Pitavastatin

Pravastatin

Rosuvastatin

Simvastatin

---

**Table A2.** Variables included in the propensity score estimation model.

*Part A claims were used to document characteristics of the recent AMI hospital course (including procedures), severity of cardiovascular disease, and the Elixhauser Comorbidity Index score.<sup>4</sup> Pre-AMI medication use was included as a marker of residents' clinically active conditions and risk of future clinical events (e.g., residents prescribed warfarin may be at higher risk of future cerebrovascular hospitalizations). A number of MDS items have been structured into reliable, valid measures of resident functional status.<sup>5-7</sup> The level of functional impairment for each resident was estimated with the MDS ADL score.<sup>8</sup> Cognitive function was measured with the Cognitive Performance Scale; scores range from 0 (intact) to 6 (severe impairment).<sup>6</sup> Other geriatric syndromes (weight loss, falls, presence and frequency of pain, and Changes in Health, End-Stage Disease, Signs, and Symptoms Scale (CHESS) score) and do not resuscitate (DNR) order status were also measured in the MDS. Facility characteristics and indicators of care quality were obtained from the most recent OSCAR survey before the acute AMI hospitalization.*

| <b>Variable Name</b> | <b>Data Source</b> | <b>Description</b>                                                                                                                             |
|----------------------|--------------------|------------------------------------------------------------------------------------------------------------------------------------------------|
| chess_nh             | MDS                | Comorbidity index, Changes in Health, End-stage disease, and Signs and Symptoms (CHESS) Scale (0 to 5) 0=Not at all unstable,5=Highly unstable |
| CXBREAT_max          | MDS                | Binary indicator of presence of shortness of breath in prior 7 days on last MDS assessment                                                     |

|                 |     |                                                                                                                                                                                               |
|-----------------|-----|-----------------------------------------------------------------------------------------------------------------------------------------------------------------------------------------------|
| back            |     | prior to index MI                                                                                                                                                                             |
| cxdizz_maxback  | MDS | Binary indicator of presence of dizziness/vertigo in prior 7 days on last MDS assessment prior to index MI                                                                                    |
| CXFL180_maxback | MDS | Binary indicator of presence of fell in the past 31 to 180 days on last MDS assessment prior to index MI                                                                                      |
| CXPAIN_maxback  | MDS | Categorical variable for highest level of pain present in the prior 7 days (i.e., frequency with which resident complains or shows evidence of pain) on last MDS assessment prior to index MI |
| CXSYNCO_maxback | MDS | Binary indicator of presence of syncope/fainting in prior 7 days on last MDS assessment prior to index MI                                                                                     |
| dmrace          | MDS | Race/ethnicity                                                                                                                                                                                |
| dmsex           | MDS | Gender                                                                                                                                                                                        |
| idage           | MDS | Age at assessment                                                                                                                                                                             |
| nhlos           | MDS | Nursing home length of stay before MI (calculated using residential history file algorithm)                                                                                                   |

|               |       |                                                              |
|---------------|-------|--------------------------------------------------------------|
| ORWTLOS       | MDS   | Weight loss (recent history of weight loss)                  |
| phadld        | MDS   | Morris additive ADL scale 0-28 (baseline)                    |
| phadld*phadld | MDS   | Quadratic term for Morris additive ADL scale 0-28 (baseline) |
| phcps         | MDS   | Fries & Morris CPS index (cognitive performance score)       |
| rhftype       | MDS   | Residential facility type                                    |
| RXANXIE       | MDS   | # of days antianxiety/hypnotics                              |
| RXDEPRE       | MDS   | # of days antidepressants                                    |
| RXHYPNO       | MDS   | # of days received hypnotic                                  |
| RXNUMBE       | MDS   | Number of medications in last 7 days                         |
| RXPSYCH       | MDS   | # of days received antipsychotics                            |
| Dnr           | MDS   | Do not resuscitate order                                     |
| dchrppd       | OSCAR | Total direct care (RN/LPN/CNA) hrs/day/resident              |

|           |       |                                            |
|-----------|-------|--------------------------------------------|
| lpn100t   | OSCAR | Total LPN FTEs/100 beds                    |
| md100t    | OSCAR | Total MD FTEs/100 beds                     |
| mdex100t  | OSCAR | Total MD extender FTEs/100 beds            |
| multifac  | OSCAR | Facility is part of a chain                |
| n_qol_def | OSCAR | OSCAR: quality-of-life deficiency score    |
| occrate   | OSCAR | OSCAR: Occupancy rate (range 0-1)          |
| owner     | OSCAR | Type of owner of nursing home              |
| paymaid   | OSCAR | Pct Medicaid patients in nursing home      |
| paymcare  | OSCAR | Pct Medicare patients in nursing home      |
| payoth2   | OSCAR | Pct Other payer; excl Medicare residents   |
| prov0740  | OSCAR | Total number of nursing home facility beds |
| psychact  | OSCAR | % receiving psychoactive drugs             |

|                        |        |                                                                               |
|------------------------|--------|-------------------------------------------------------------------------------|
| psych*psych*           | OSCAR  | Cubic term for % receiving psychoactive drugs                                 |
| psych                  |        |                                                                               |
| psychdx                | OSCAR  | Pct with psychiatric diagnosis                                                |
| pt100t                 | OSCAR  | Total physical therapy FTEs/100 beds                                          |
| restrain               | OSCAR  | Pct physically restrained                                                     |
| rn100t                 | OSCAR  | Total RN FTEs/100 beds                                                        |
| rn100t*rn100t          | OSCAR  | Quadratic term for total RN FTEs/100 beds                                     |
| az_af                  | Part A | Binary indicator of presence of atrial fibrillation in 1 yr prior to index MI |
| az_alzheimers          | Part A | Binary indicator of presence of Alzheimer's disease in 1 yr prior to index MI |
| az_angina_pecto<br>ris | Part A | Binary indicator of presence of angina pectoris in 1 yr prior to index MI     |
| az_arthritis           | Part A | Binary indicator of presence of arthritis in 1 yr prior to index MI           |
| az_asthma              | Part A | Binary indicator of presence of asthma in 1 yr prior to index MI              |



|                   |        |                                                                                                 |
|-------------------|--------|-------------------------------------------------------------------------------------------------|
| az_CHF            | Part A | Binary indicator of presence of congestive heart failure in 1 yr prior to index MI              |
| az_cop            | Part A | Binary indicator of presence of chronic obstructive pulmonary disease in 1 yr prior to index MI |
| az_depression     | Part A | Binary indicator of presence of depression in 1 yr prior to index MI                            |
| az_dm             | Part A | Binary indicator of presence of diabetes mellitus in 1 yr prior to index MI                     |
| az_dyslipidemia   | Part A | Binary indicator of presence of dyslipidemia in 1 yr prior to index MI                          |
| az_hypertension   | Part A | Binary indicator of presence of hypertension in 1 yr prior to index MI                          |
| az_hypothyroidism | Part A | Binary indicator of presence of hypothyroidism in 1 yr prior to index MI                        |
| az_obesity        | Part A | Binary indicator of presence of obesity in 1 yr prior to index MI                               |
| az_osteoporosis   | Part A | Binary indicator of presence of osteoporosis in 1 yr prior to index MI                          |
| az_pvd            | Part A | Binary indicator of presence of peripheral vascular disease in 1 yr prior to index MI           |
| az_tachyarrhyth   | Part A | Binary indicator of presence of arrhythmias in 1 yr prior to index MI                           |

|                        |        |                                                                                                                                                                      |
|------------------------|--------|----------------------------------------------------------------------------------------------------------------------------------------------------------------------|
| mias                   |        |                                                                                                                                                                      |
| az_unstable_angi<br>na | Part A | Binary indicator of presence of unstable angina in 1 yr prior to index MI                                                                                            |
| hosp_count_1yr         | Part A | Number of hospitalizations in 1 yr prior to index MI, from part A inpt                                                                                               |
| ICU_CCU_grou<br>p      | Part A | Group: Number of days at ICU or CCU during index MI hosp stay                                                                                                        |
| los_mi_stay            | Part A | Number of days in the hospital during index MI hospital stay                                                                                                         |
| pcicabg                | Part A | Coronary revascularization or angioplasty procedures performed during the acute myocardial infarction hospitalization                                                |
| max_hielix             | Part A | Max of Elixhauser among hospitalizations in 1 yr prior to the index MI, from Part A inpt                                                                             |
| bb_exp                 | Part D | Binary indicator of concurrent prescribing of an oral beta-blocker drug (e.g., metoprolol) at the time the new statin prescription was dispensed after the index MI  |
| asp_exp                | Part D | Binary indicator of concurrent prescribing of an oral antiplatelet drug (e.g., clopidogrel) at the time the new statin prescription was dispensed after the index MI |

|                      |        |                                                                                                                                                                                                       |
|----------------------|--------|-------------------------------------------------------------------------------------------------------------------------------------------------------------------------------------------------------|
| aceorarb_exp         | Part D | Binary indicator of concurrent prescribing of an oral renin angiotensin aldosterone system inhibitor drug (e.g., lisinopril) at the time the new statin prescription was dispensed after the index MI |
| d_alpha_adrenergic   | Part D | Binary indicator of presence of alpha 2 adrenergic agonist drug (e.g. clonidine, guanfacine) in 1 yr prior to index MI                                                                                |
| d_analgesic_comb     | Part D | Binary indicator of presence of combination opioid analgesic drug (e.g. acetaminophen with oxycodone) in 1 yr prior to index MI                                                                       |
| d_analgesic_opioid   | Part D | Binary indicator of presence of opioid analgesic drug (e.g. oxycodone) in 1 yr prior to index MI                                                                                                      |
| d_Antiarrhythmic_Ib  | Part D | Binary indicator of presence of class Ib antiarrhythmic drug (e.g., lidocaine or phenytoin) in 1 yr prior to index MI                                                                                 |
| d_Antiarrhythmic_III | Part D | Binary indicator of presence of class III antiarrhythmic drug (e.g., amiodarone, sotalol, dofetilide) in 1 yr prior to index MI                                                                       |
| d_Antiarrhythmic_IV  | Part D | Binary indicator of presence of class IV antiarrhythmic drug (i.e., non-dihydropyridine                                                                                                               |

|                          |        |                                                                                                               |
|--------------------------|--------|---------------------------------------------------------------------------------------------------------------|
| c_IV                     |        | calcium channel blockers, e.g., diltiazem or verapamil) in 1 yr prior to index MI                             |
| d_Antiarrhythmi<br>c_mis | Part D | Binary indicator of presence of antiarrhythmic drug (misc) in 1 yr prior to index MI                          |
| d_Anticholinergi<br>c    | Part D | Binary indicator of presence of anticholinergic drug (e.g., ipratroium, tiotropium) in 1 yr prior to index MI |
| d_Anticoagulant          | Part D | Binary indicator of presence of anticoagulant (e.g., dabigatran) in 1 yr prior to index MI                    |
| d_Anticoagulant<br>_cou  | Part D | Binary indicator of presence of coumarin derivative anticoagulant (e.g., warfarin) in 1 yr prior to index MI  |
| d_Antidepressant<br>_SAR | Part D | Binary indicator of presence of antidepressant in 1 yr prior to index MI                                      |
| d_Antidepressant<br>_SNR | Part D | Binary indicator of presence of SNRI antidepressant in 1 yr prior to index MI                                 |
| d_Antidepressant<br>_SSR | Part D | Binary indicator of presence of SSRI antidepressant in 1 yr prior to index MI                                 |

|                          |        |                                                                                                                                      |
|--------------------------|--------|--------------------------------------------------------------------------------------------------------------------------------------|
| d_Antilipemic_2<br>Azeti | Part D | Binary indicator of presence of 2-azetidinone antilipemic drug (e.g., ezetimibe) in 1 yr prior to index MI                           |
| d_Antilipemic_B<br>CS    | Part D | Binary indicator of presence of bile acid sequestrant antilipemic drug (e.g., cholestyramine, colesevelam) in 1 yr prior to index MI |
| d_Antilipemic_F<br>ibric | Part D | Binary indicator of presence of fibric acid antilipemic drug (e.g., gemfibrozil, fenofibrate) in 1 yr prior to index MI              |
| d_antiparkinson_<br>Dopa | Part D | Binary indicator of presence of dopamine agonist drug in 1 yr prior to index MI                                                      |
| d_Antipsychotic<br>_atyp | Part D | Binary indicator of presence of atypical antipsychotic drug in 1 yr prior to index MI                                                |
| d_Antipsychotic<br>_typi | Part D | Binary indicator of presence of typical antipsychotic drug in 1 yr prior to index MI                                                 |
| d_Benzodiazepin<br>e     | Part D | Binary indicator of presence of benzodiazepine drug (e.g., alprazolam, lorazepam) in 1 yr prior to index MI                          |

|                          |        |                                                                                                                             |
|--------------------------|--------|-----------------------------------------------------------------------------------------------------------------------------|
| d_Calcium                | Part D | Binary indicator of presence of calcium channel blocker drug (e.g., amlodipine) in 1 yr prior to index MI                   |
| d_Diuretic_Loop          | Part D | Binary indicator of presence of loop diuretic drug (e.g., furosemide) in 1 yr prior to index MI                             |
| d_Diuretic_Potas<br>sium | Part D | Binary indicator of presence of potassium-sparing diuretic drug (e.g., spironolactone) in 1 yr prior to index MI            |
| d_Diuretic_Thia<br>zide  | Part D | Binary indicator of presence of thiazide diuretic drug (e.g., hydrochlorothiazide) in 1 yr prior to index MI                |
| d_Diuretic_Thia<br>zide_ | Part D | Binary indicator of presence of thiazide-related diuretic in 1 yr prior to index MI                                         |
| d_Hypnotic               | Part D | Binary indicator of presence of nonbenzodiazpine hypnotic drug (e.g. zolpidem) in 1 yr prior to index MI                    |
| d_LMWH                   | Part D | Binary indicator of presence of low molecular weight heparin anticoagulant drug (e.g. enoxaparin) in 1 yr prior to index MI |
| d_nitrate                | Part D | Binary indicator of presence of nitrate drug (nitroglycerin, isosorbide mononitrate, isosorbide                             |

|               |        |                                                                                                                                 |
|---------------|--------|---------------------------------------------------------------------------------------------------------------------------------|
|               |        | dinitrate) in 1 yr prior to index MI                                                                                            |
| d_NSAID_cox2  | Part D | Binary indicator of presence of cox-2 selective non-steroidal anti-inflammatory drug (e.g. celecoxib) in 1 yr prior to index MI |
| d_Vasodilator | Part D | Binary indicator of presence of direct-acting vasodilator drug (e.g. hydralazine) in 1 yr prior to index MI                     |

Journal Pre-proof

**Table A3.** Covariate\* balance between treatment groups before and after propensity score matching.

| Variable Name | Absolute Standardized Mean Differences |                |
|---------------|----------------------------------------|----------------|
|               | Before Matching                        | After Matching |
| idage         | 0.34                                   | 0.02           |
| phadld        | 0.18                                   | 0.02           |
| rxpsych       | 0.04                                   | 0.03           |
| rxanxie       | 0.00                                   | 0.01           |
| rxdepre       | 0.02                                   | 0.00           |
| rxhypno       | 0.04                                   | 0.01           |
| psychdx       | 0.04                                   | 0.03           |
| psychact      | 0.08                                   | 0.02           |
| max_hielix    | 0.04                                   | 0.01           |
| prov0740      | 0.10                                   | 0.01           |
| RXNUMBE       | 0.05                                   | 0.02           |
| dchrppd       | 0.06                                   | 0.01           |
| lpn100t       | 0.02                                   | 0.02           |
| md100t        | 0.05                                   | 0.01           |
| mdex100t      | 0.10                                   | 0.01           |
| n_qol_def     | 0.01                                   | 0.01           |
| occcrate      | 0.05                                   | 0.00           |



|                 |      |      |
|-----------------|------|------|
| paymcaid        | 0.05 | 0.00 |
| paymcare        | 0.11 | 0.01 |
| payoth2         | 0.00 | 0.01 |
| pt100t          | 0.05 | 0.03 |
| restrain        | 0.04 | 0.01 |
| rn100t          | 0.13 | 0.01 |
| los_mi_stay     | 0.03 | 0.02 |
| hosp_count_1yr  | 0.06 | 0.02 |
| nhlos           | 0.19 | 0.06 |
| chess_nh        | 0.09 | 0.02 |
| CXBREAT_maxback | 0.03 | 0.04 |
| cxdizz_maxback  | 0.00 | 0.02 |
| CXFL180_maxback | 0.07 | 0.02 |
| CXPAIN_maxback  | 0.05 | 0.02 |
| CXSYNCO_maxback | 0.03 | 0.01 |
| dmrace          | 0.06 | 0.02 |
| dmsex           | 0.16 | 0.02 |
| ORWTLOS         | 0.10 | 0.02 |
| phcps           | 0.26 | 0.05 |
| rhftype         | 0.17 | 0.03 |
| Dnr             | 0.17 | 0.03 |
| multifac        | 0.06 | 0.01 |
| owner           | 0.05 | 0.02 |

|                     |      |      |
|---------------------|------|------|
| az_af               | 0.09 | 0.00 |
| az_alzheimers       | 0.09 | 0.01 |
| az_angina_pectoris  | 0.25 | 0.03 |
| az_arthritis        | 0.04 | 0.01 |
| az_asthma           | 0.03 | 0.02 |
| az_CHF              | 0.01 | 0.01 |
| az_cop              | 0.01 | 0.02 |
| az_depression       | 0.03 | 0.02 |
| az_dm               | 0.15 | 0.01 |
| az_dyslipidemia     | 0.41 | 0.05 |
| az_hypertension     | 0.13 | 0.01 |
| az_hypothyroidism   | 0.04 | 0.03 |
| az_obesity          | 0.09 | 0.01 |
| az_osteoporosis     | 0.00 | 0.00 |
| az_pvd              | 0.09 | 0.01 |
| az_tachyarrhythmias | 0.05 | 0.03 |
| az_unstable_angina  | 0.01 | 0.01 |
| ICU_CCU_group       | 0.22 | 0.03 |
| pcicabg             | 0.22 | 0.03 |
| bb_exp              | 0.62 | 0.03 |
| asp_exp             | 0.53 | 0.02 |
| aceorarb_exp        | 0.34 | 0.01 |
| d_alpha_adrenergic  | 0.02 | 0.01 |

|                      |      |      |
|----------------------|------|------|
| d_analgesic_comb     | 0.11 | 0.01 |
| d_analgesic_opioid   | 0.12 | 0.01 |
| d_Antiarrhythmic_Ib  | 0.02 | 0.00 |
| d_Antiarrhythmic_III | 0.06 | 0.01 |
| d_Antiarrhythmic_IV  | 0.08 | 0.00 |
| d_Antiarrhythmic_mis | 0.08 | 0.00 |
| d_Anticholinergic    | 0.10 | 0.04 |
| d_Anticoagulant      | 0.00 | 0.00 |
| d_Anticoagulant_cou  | 0.10 | 0.01 |
| d_Antidepressant_SAR | 0.10 | 0.01 |
| d_Antidepressant_SNR | 0.10 | 0.01 |
| d_Antidepressant_SSR | 0.10 | 0.01 |
| d_Antilipemic_2Azeti | 0.00 | 0.03 |
| d_Antilipemic_BCS    | 0.03 | 0.03 |
| d_Antilipemic_Fibric | 0.03 | 0.01 |
| d_antiparkinson_Dopa | 0.03 | 0.01 |
| d_Antipsychotic_atyp | 0.03 | 0.01 |
| d_Antipsychotic_typi | 0.03 | 0.01 |
| d_Benzodiazepine     | 0.01 | 0.00 |
| d_Calcium            | 0.02 | 0.00 |
| d_Diuretic_Loop      | 0.23 | 0.02 |
| d_Diuretic_Potassium | 0.08 | 0.01 |
| d_Diuretic_Thiazide  | 0.02 | 0.00 |

|                      |      |      |
|----------------------|------|------|
| d_Diuretic_Thiazide_ | 0.02 | 0.00 |
| d_Hypnotic           | 0.03 | 0.01 |
| d_LMWH               | 0.01 | 0.01 |
| d_nitrate            | 0.18 | 0.01 |
| d_NSAID_cox2         | 0.01 | 0.01 |
| d_Vasodilator        | 0.18 | 0.01 |

\*A label and description for each covariate can be found in Table A2.

Journal Pre-proof

**Figure A2.** Distribution of the propensity score between statin users and nonusers before and after propensity score matching.

Before Matching

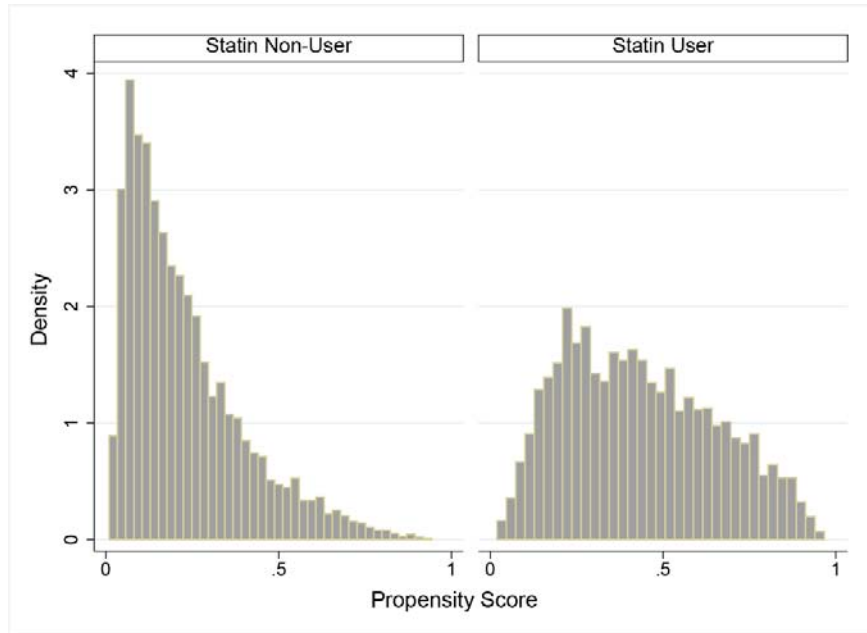

After Matching

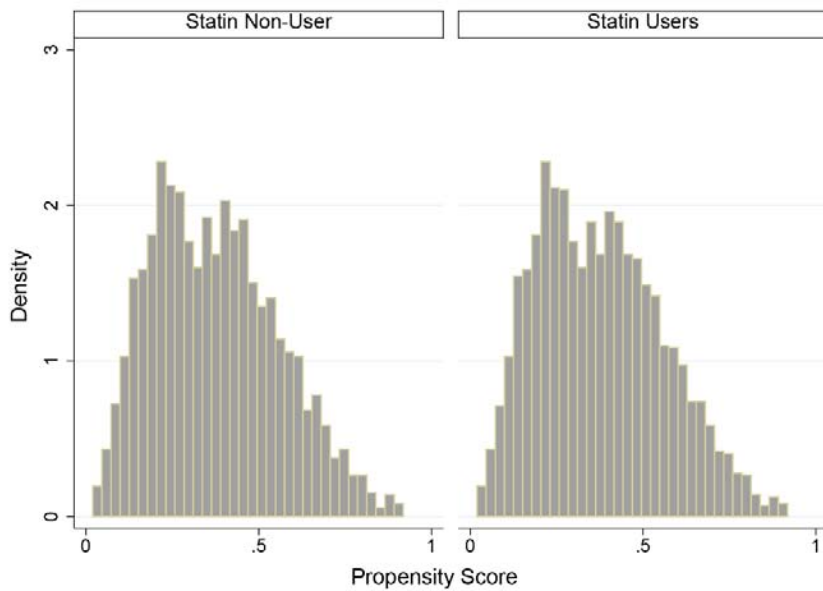

**Table A4.** Effect of statin use versus non-use on outcomes among frail older adults after myocardial infarction before vs. after propensity score matching.

| Outcome            | Matching   | Events / n    |               | PY     |           | Percent with Outcome |           | HR (95% CLs)      | Risk Difference (95% CLs) | NNT / NNH (95% CLs)             | Difference in RMST (95% CLs) |
|--------------------|------------|---------------|---------------|--------|-----------|----------------------|-----------|-------------------|---------------------------|---------------------------------|------------------------------|
|                    |            | Statin        | No Statin     | Statin | No Statin | Statin               | No Statin |                   |                           |                                 |                              |
| Mortality          | Unmatched* | 1,071 / 3,217 | 3,573 / 7,975 | 2,595  | 5,788     | 33.3                 | 44.8      | 0.67 (0.63, 0.72) | -11.5 (-13.5, -9.6)       | NNT 9 (8, 11)                   | 30 (25, 34)                  |
|                    | Matched*   | 934 / 2,720   | 1,102 / 2,720 | 2,173  | 2,054     | 34.3                 | 40.5      | 0.80 (0.73, 0.87) | -6.2 (-8.7, -3.6)         | NNT 17 (12, 28)                 | 16 (10, 22)                  |
| Rehospitalization  | Unmatched* | 1,707 / 3,217 | 3,806 / 7,975 | 2,037  | 5,326     | 53.1                 | 47.7      | 1.16 (1.09, 1.22) | 5.3 (3.3, 7.4)            | NNH 19 (14, 31)                 | -13 (-18, -7)                |
|                    | Matched*   | 1,438 / 2,720 | 1,374 / 2,720 | 1,728  | 1,760     | 52.9                 | 50.5      | 1.06 (0.98, 1.14) | 2.4 (-0.3, 5.0)           | NNH 43 (NNT 313 to ∞ to NNH 20) | -4 (-12, 3)                  |
| Functional Decline | Unmatched* | 650 / 3,217   | 1,124 / 7,975 | 2,265  | 5,255     | 20.2                 | 14.1      | 1.37 (1.24, 1.51) | 6.1 (4.5, 7.7)            | NNH 17 (13, 21)                 | -14 (-18, -9)                |
|                    | Matched*   | 507 / 2,720   | 484 / 2,720   | 1,813  | 1,917     | 18.6                 | 17.8      | 1.00 (0.88, 1.14) | 0.9 (-1.2, 2.9)           | NNH 118 (NNT 86 to ∞ to NNH 35) | -1 (-6, 5)                   |

Abbreviations: PY, person-years; HR, hazard ratio; CLs, confidence limits; NNT, number needed to treat; NNH, number needed to harm; RMST, restricted mean survival time.

\*Unmatched analyses are analogous to “unadjusted” or “crude” analyses while the matched analyses are analogous to “adjusted” analyses accounting for differences in characteristics between statin users and non-users.

Journal Pre-proof

**Table A5.** Stability analysis using Fine and Gray subdistribution hazard model to estimate the effect of statin use versus non-use on outcomes while accounting for the competing risk of death among frail older adults after myocardial infarction in the propensity score-matched cohort.

| <b>Outcome</b>     | <b>HR (95% CLs)</b> |
|--------------------|---------------------|
| Rehospitalization  | 1.06 (0.99, 1.15)   |
| Functional Decline | 1.03 (0.91, 1.17)   |

Journal Pre-proof



**Table A6.** Subgroup analyses of the effect of statin use versus non-use on rehospitalization among frail older adults after myocardial infarction.

| <b>Subgroup</b>                     | <b>HR (95% CI)</b> | <b>P-Value for Effect Modification</b> |
|-------------------------------------|--------------------|----------------------------------------|
| <b>Functional impairment*</b>       |                    |                                        |
| Independent to mild impairment      | 1.08 (0.95-1.23)   | 0.23                                   |
| Moderate impairment                 | 1.12 (0.98-1.27)   |                                        |
| Severe impairment                   | 0.96 (0.84-1.10)   |                                        |
| <b>Cognitive impairment†</b>        |                    |                                        |
| Intact cognition to mild impairment | 1.03 (0.93-1.13)   | 0.43                                   |
| Moderate to severe impairment       | 1.09 (0.97-1.22)   |                                        |
| <b>Age, y</b>                       |                    |                                        |
| <85                                 | 1.04 (0.95-1.15)   | 0.77                                   |
| ≥85                                 | 1.07 (0.95-1.20)   |                                        |
| <b>Sex</b>                          |                    |                                        |
| Male                                | 1.04 (0.91-1.18)   | 0.73                                   |
| Female                              | 1.07 (0.97-1.17)   |                                        |
| <b>ICU/CCU stay</b>                 |                    |                                        |
| None                                | 1.10 (0.97-1.24)   | 0.48                                   |
| ≥1 d                                | 1.04 (0.90-1.21)   |                                        |
| <b>Polypharmacy</b>                 |                    |                                        |
| <11 medications                     | 1.10 (0.98-1.24)   | 0.28                                   |
| ≥11 medications                     | 1.01 (0.92-1.12)   |                                        |

\*Measured using the Minimum Data Set 28-point Activities of Daily Living (ADL) Scale; Independent to mild impairment is represented by an ADL score of 0 to 14 (independent to limited assistance required with ADLs), moderate impairment is represented by an ADL score of 15 to 19 (extensive assistance required with ADLs), and severe impairment is represented by an ADL score of ≥20 (extensive dependency in ADLs).

†Measured using the Minimum Data Set Cognitive Performance Score (CPS); Intact to Mild Impairment is represented by a CPS score of 0 to 2, and Moderate to Severe Impairment is a score of ≥3.

## References for Online Appendices

1. Steinman MA, Zullo AR, Lee Y, et al. Association of beta-Blockers With Functional Outcomes, Death, and Rehospitalization in Older Nursing Home Residents After Acute Myocardial Infarction. *JAMA internal medicine*. 2017;177(2):254-262.
2. Zullo AR, Sharmin S, Lee Y, et al. Secondary Prevention Medication Use After Myocardial Infarction in U.S. Nursing Home Residents. *Journal of the American Geriatrics Society*. 2017;65(11):2397-2404.
3. Zullo AR, Lee Y, Daiello LA, et al. Beta-Blocker Use in U.S. Nursing Home Residents After Myocardial Infarction: A National Study. *Journal of the American Geriatrics Society*. 2017;65(4):754-762.
4. Southern DA, Quan H, Ghali WA. Comparison of the Elixhauser and Charlson/Deyo methods of comorbidity measurement in administrative data. *Medical care*. 2004;42(4):355-360.
5. Carpenter GI, Hastie CL, Morris JN, Fries BE, Ankri J. Measuring change in activities of daily living in nursing home residents with moderate to severe cognitive impairment. *BMC geriatrics*. 2006;6:7.
6. Morris JN, Fries BE, Mehr DR, et al. MDS Cognitive Performance Scale. *J Gerontol*. 1994;49(4):M174-182.
7. Mor V. A comprehensive clinical assessment tool to inform policy and practice: applications of the minimum data set. *Medical care*. 2004;42(4 Suppl):III50-59.
8. Morris JN, Fries BE, Morris SA. Scaling ADLs within the MDS. *The journals of gerontology Series A, Biological sciences and medical sciences*. 1999;54(11):M546-553.
